# Supplementary material
Source: HighWire-hosted journal article supplement (http://dmd.aspetjournals.org/highwire/filestream/79977/field_highwire_adjunct_files/0/975_supp_data.pdf)
Supplement: 975_supp_data.pdf [file 975_supp_data.pdf]

## Supplementary Information

### Relevance of Human Aldoketoreductases and Microbial $\beta$ -Glucuronidases in

#### Testosterone Disposition

Abdul Basit<sup>1</sup>, John K. Amory<sup>2</sup>, Vijay Saradhi Mettu<sup>1</sup>, Cindy Yanfei Li<sup>3</sup>, Scott Heyward<sup>4</sup>, Parth B. Jariwala<sup>5</sup>, Matthew R. Redinbo<sup>5</sup> and Bhagwat Prasad<sup>1</sup>

<sup>1</sup>Department of Pharmaceutical Sciences, Washington State University, Spokane, WA

<sup>2</sup>Department of Medicine, University of Washington, Seattle, WA

<sup>3</sup>Department of Pharmaceutics, University of Washington, Seattle, WA

<sup>4</sup>BioIVT Inc., Baltimore, MD

<sup>5</sup>Departments of Chemistry, Biochemistry and Microbiology, and the Integrated Program for Biological and Genome Sciences, University of North Carolina at Chapel Hill, Chapel Hill, NC, USA.

**Running title: AKRs and GUSs in Testosterone Disposition**

**Corresponding author:** Bhagwat Prasad, Ph.D., Department of Pharmaceutical Sciences, Washington State University, Spokane, WA 99202, USA. Phone: +1-509-358-7739. Fax: +1 509-368-6561. Email: [bhagwat.prasad@wsu.edu](mailto:bhagwat.prasad@wsu.edu)

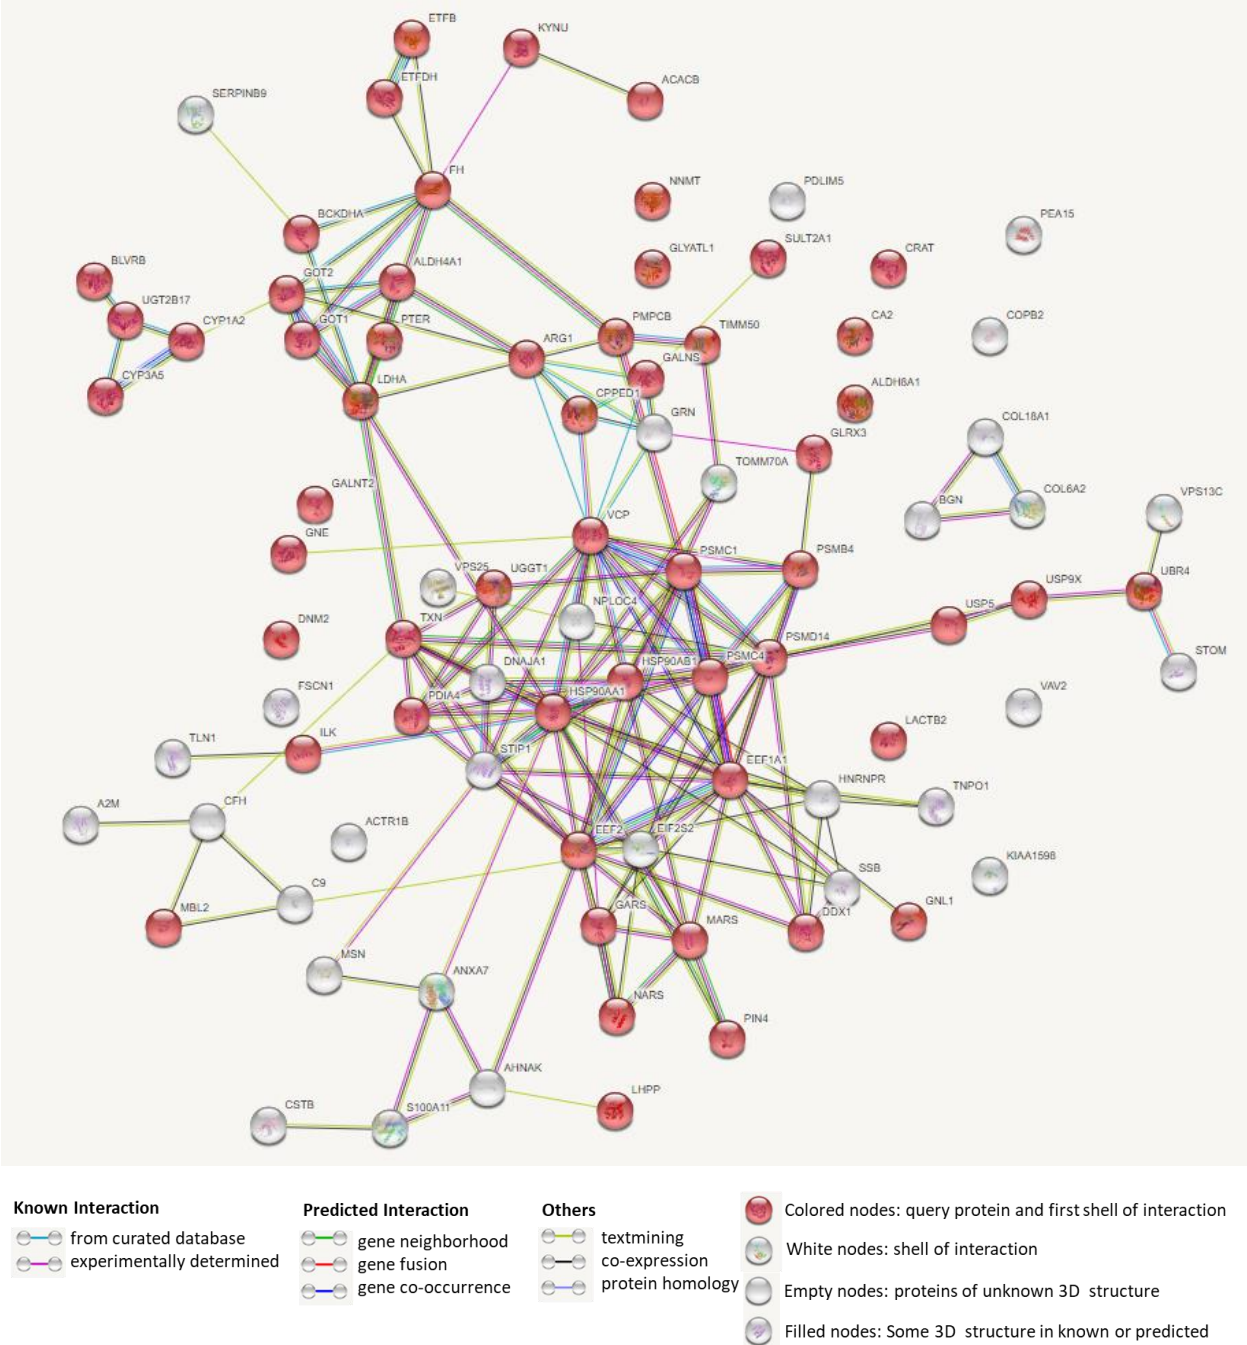

**Fig. S1:** Protein interactome analysis by STRING from downregulated proteins in UGT2B17 deletion. Significantly downregulated proteins include UGT2B17, CYP3A5, CYP1A2, and SULT2A1

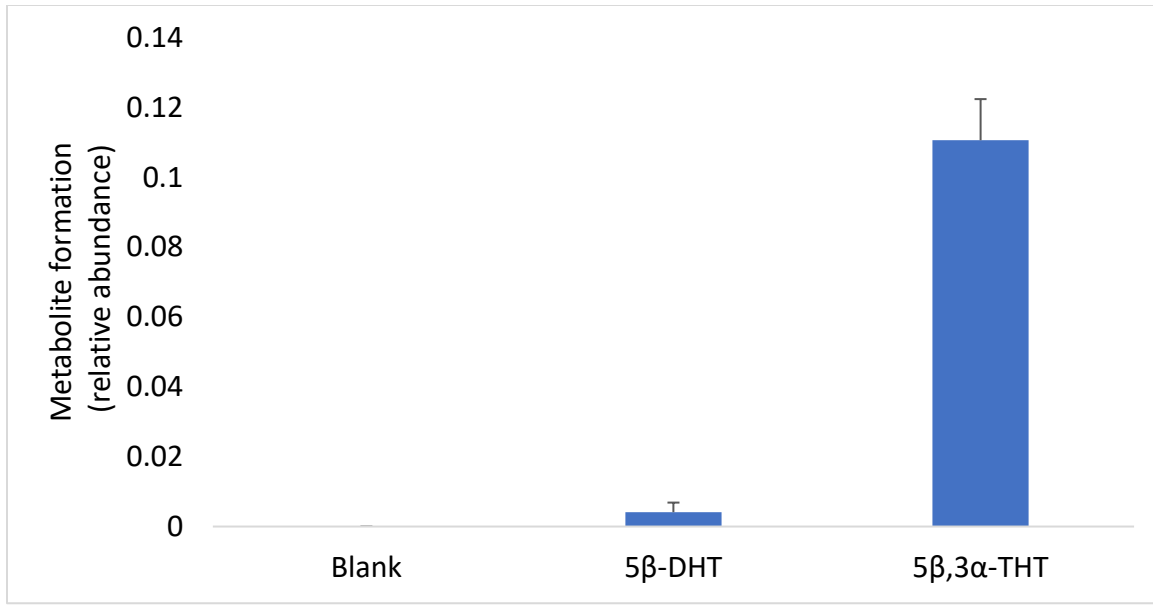

**Fig. S2:** In vitro formation of testosterone metabolites by AKR pathway when incubated at 1  $\mu$ M for 30 min with human liver cytosol from UGT2B17 gene deletion subjects.

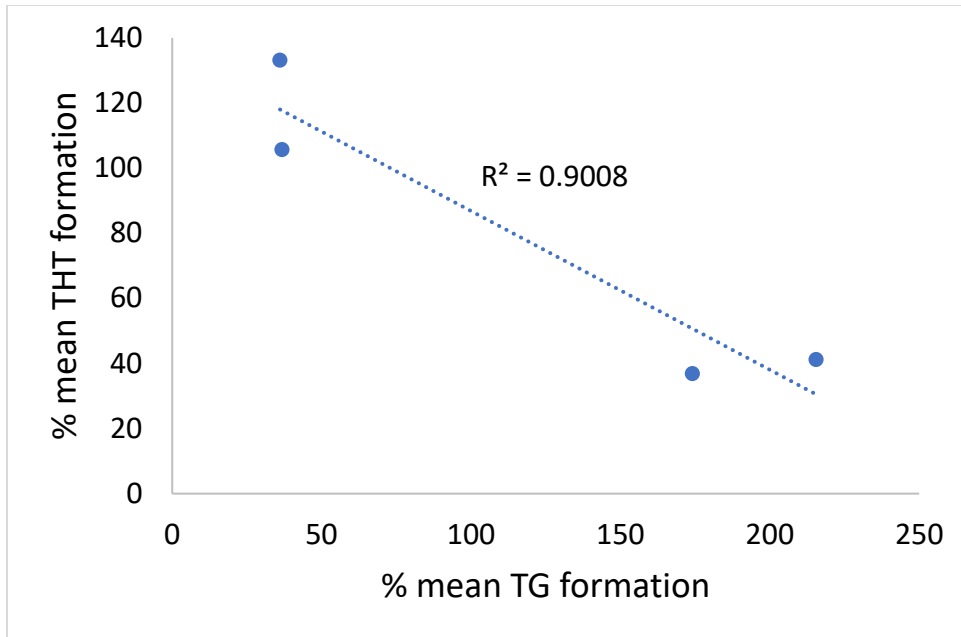

**Fig. S3:** Negative correlation between TG and THT formation from testosterone incubation in human hepatocytes with high and low UGT2B17 expression.

| <b>Table S1:</b> MRM transitions used for quantification of various primary and secondary metabolites of testosterone |                                     |                     |                    |        |         |
|-----------------------------------------------------------------------------------------------------------------------|-------------------------------------|---------------------|--------------------|--------|---------|
| Metabolite                                                                                                            | Adduct                              | Precursor ion (m/z) | Daughter Ion (m/z) | CV (V) | CE (eV) |
| 5 $\beta$ -DHT                                                                                                        | [M+H] <sup>+</sup>                  | 291.1               | 147.1              | 30     | 20      |
|                                                                                                                       | [M+H] <sup>+</sup>                  | 291.1               | 159                | 30     | 20      |
|                                                                                                                       | [M+H] <sup>+</sup>                  | 291.1               | 255                | 30     | 20      |
| 5 $\beta$ , 3 $\alpha$ -THT                                                                                           | [M+H-H <sub>2</sub> O] <sup>+</sup> | 275.1               | 161                | 30     | 20      |
|                                                                                                                       | [M+H-H <sub>2</sub> O] <sup>+</sup> | 275.1               | 174.8              | 30     | 15      |
|                                                                                                                       | [M+H-H <sub>2</sub> O] <sup>+</sup> | 275.1               | 257                | 30     | 15      |
| 5 $\beta$ -DHT-Gluc                                                                                                   | [M+H] <sup>+</sup>                  | 467.1               | 147.1              | 30     | 23      |
|                                                                                                                       | [M+H] <sup>+</sup>                  | 467.1               | 159                | 30     | 23      |
|                                                                                                                       | [M+H] <sup>+</sup>                  | 467.1               | 255                | 30     | 27      |
|                                                                                                                       | [M+H] <sup>+</sup>                  | 467.1               | 273.1              | 30     | 27      |
| 5 $\beta$ , 3 $\alpha$ -THT-Gluc                                                                                      | [M+H-H <sub>2</sub> O] <sup>+</sup> | 451.1               | 161                | 30     | 25      |
|                                                                                                                       | [M+H-H <sub>2</sub> O] <sup>+</sup> | 451.1               | 174.8              | 30     | 20      |
|                                                                                                                       | [M+H-H <sub>2</sub> O] <sup>+</sup> | 451.1               | 257                | 30     | 20      |
|                                                                                                                       | [M+H-H <sub>2</sub> O] <sup>+</sup> | 451.1               | 275.1              | 30     | 20      |
| AG-d4                                                                                                                 | [M+H-H <sub>2</sub> O] <sup>+</sup> | 453.2               | 259.2              | 35     | 30      |
|                                                                                                                       | [M+H-H <sub>2</sub> O] <sup>+</sup> | 453.2               | 277.4              | 35     | 22      |
|                                                                                                                       | [M+NH <sub>4</sub> ] <sup>+</sup>   | 488.3               | 259.3              | 35     | 30      |
| T                                                                                                                     | [M+H] <sup>+</sup>                  | 289.1               | 109.1              | 35     | 30      |
|                                                                                                                       | [M+H] <sup>+</sup>                  | 289.1               | 97.1               | 35     | 30      |
| T-d3                                                                                                                  | [M+H] <sup>+</sup>                  | 292.2               | 97.1               | 35     | 30      |
|                                                                                                                       | [M+H] <sup>+</sup>                  | 292.2               | 109.1              | 35     | 30      |
| epiTG                                                                                                                 | [M+H] <sup>+</sup>                  | 465.2               | 289.2              | 35     | 30      |
|                                                                                                                       | [M+H] <sup>+</sup>                  | 465.2               | 97.1               | 35     | 40      |
|                                                                                                                       | [M+H] <sup>+</sup>                  | 465.2               | 109.1              | 35     | 40      |
| TG                                                                                                                    | [M+H] <sup>+</sup>                  | 465.2               | 289.2              | 35     | 30      |
|                                                                                                                       | [M+H] <sup>+</sup>                  | 465.2               | 97.1               | 35     | 40      |
|                                                                                                                       | [M+H] <sup>+</sup>                  | 465.2               | 109.1              | 35     | 40      |
| TG-d3                                                                                                                 | [M+H] <sup>+</sup>                  | 468.2               | 292.2              | 35     | 30      |
|                                                                                                                       | [M+H] <sup>+</sup>                  | 468.2               | 97.1               | 35     | 40      |
|                                                                                                                       | [M+H] <sup>+</sup>                  | 468.2               | 109.1              | 35     | 40      |

| <b>Table S2:</b> Optimized enzyme concentration and pH used for TG deconjugation screening assay using the listed bacterial $\beta$ -glucuronidases |                                        |                     |
|-----------------------------------------------------------------------------------------------------------------------------------------------------|----------------------------------------|---------------------|
| <b>Bacterial species</b>                                                                                                                            | <b>Final enzyme concentration (nM)</b> | <b>Optimized pH</b> |
| <i>Escherichia coli</i>                                                                                                                             | 5                                      | 6.5                 |
| <i>Eubacterium eligens</i>                                                                                                                          | 5                                      | 6.5                 |
| <i>Lactobacillus rhamnosus</i>                                                                                                                      | 30                                     | 6.5                 |
| <i>Bacteroides uniformis</i>                                                                                                                        | 30                                     | 6                   |
| <i>Roseburia hominis</i>                                                                                                                            | 5                                      | 6                   |
| <i>Bacteroides fragilis</i>                                                                                                                         | 25                                     | 5                   |
| <i>Bacteroides ovatus</i>                                                                                                                           | 30                                     | 5                   |
| <i>Akkermansia muciniphila</i>                                                                                                                      | 20                                     | 6.5                 |
| <i>Bacteroides coprocola</i>                                                                                                                        | 50                                     | 4                   |
| <i>Bacteroides nordi</i>                                                                                                                            | 50                                     | 5                   |

| <b>Table S3:</b> MRM transitions for testosterone and testosterone glucuronide using AB SCIEX 6500 |                    |                     |                    |        |         |
|----------------------------------------------------------------------------------------------------|--------------------|---------------------|--------------------|--------|---------|
| Metabolite                                                                                         | Adduct             | Precursor ion (m/z) | Daughter Ion (m/z) | DP (V) | CE (eV) |
| T                                                                                                  | [M+H] <sup>+</sup> | 289.1               | 109.1              | 80     | 30      |
|                                                                                                    | [M+H] <sup>+</sup> | 289.1               | 97.1               | 80     | 30      |
| TG                                                                                                 | [M+H] <sup>+</sup> | 465.2               | 289.2              | 70     | 25      |
|                                                                                                    | [M+H] <sup>+</sup> | 465.2               | 271.2              | 70     | 30      |
|                                                                                                    | [M+H] <sup>+</sup> | 465.2               | 109.1              | 70     | 35      |
| TG-d3                                                                                              | [M+H] <sup>+</sup> | 468.2               | 292.2              | 70     | 25      |
|                                                                                                    | [M+H] <sup>+</sup> | 468.2               | 274.2              | 70     | 30      |
|                                                                                                    | [M+H] <sup>+</sup> | 468.2               | 256.2              | 70     | 35      |
| T-d3                                                                                               | [M+H] <sup>+</sup> | 292.2               | 97.1               | 80     | 30      |
|                                                                                                    | [M+H] <sup>+</sup> | 292.2               | 109.1              | 80     | 30      |

| <b>Table S4:</b> Differentially elevated metabolites in serum after oral testosterone dosing in men |             |          |                  |         |         |                      |           |
|-----------------------------------------------------------------------------------------------------|-------------|----------|------------------|---------|---------|----------------------|-----------|
| Metabolite ID                                                                                       | Fold-change | P value  | Exact mass (m/z) | Predose |         | Testosterone treated |           |
|                                                                                                     |             |          |                  | mean1   | sd1     | mean2                | sd2       |
| M486T45                                                                                             | 135.8       | 9.45E-06 | 486.3061         | 564555  | 277163  | 76673454             | 14724405  |
| M274T47_2                                                                                           | 35.9        | 1.57E-05 | 274.2245         | 2215813 | 1009919 | 79627571             | 16457424  |
| M451T54_1                                                                                           | 108.1       | 7.99E-04 | 451.3248         | 448115  | 624399  | 48440130             | 20437127  |
| M403T68_1                                                                                           | 376.9       | 5.21E-07 | 403.2326         | 160100  | 117231  | 60347036             | 7121192   |
| M449T47                                                                                             | 103.2       | 7.36E-04 | 449.2533         | 695862  | 805690  | 71816597             | 29813267  |
| M520T61_1                                                                                           | 56.3        | 1.50E-03 | 519.8652         | 761412  | 544347  | 42854221             | 20225532  |
| M432T47_1                                                                                           | 137.3       | 9.99E-04 | 432.2461         | 678100  | 1070656 | 93102785             | 41053663  |
| M234T38                                                                                             | 63.2        | 8.76E-05 | 234.1699         | 2008252 | 369723  | 126976655            | 35564331  |
| M484T47_1                                                                                           | 105.7       | 3.08E-08 | 484.2904         | 2097666 | 4619778 | 221652247            | 19651543  |
| M238T44_2                                                                                           | 70.4        | 8.51E-07 | 238.1801         | 3508011 | 2393181 | 246926861            | 31785644  |
| M376T52_2                                                                                           | 103.6       | 8.55E-04 | 376.2594         | 2626951 | 2706553 | 272237792            | 116264603 |
| M302T45_3                                                                                           | 51.5        | 1.19E-03 | 302.1961         | 4193737 | 2531590 | 216117969            | 97276040  |
| M450T54_2                                                                                           | 42.1        | 8.69E-04 | 450.3213         | 4052959 | 4876921 | 170821561            | 72395557  |
| M274T37_3                                                                                           | 189.8       | 2.23E-06 | 274.2011         | 1772298 | 2057781 | 336402349            | 50803785  |
| M465T39_2                                                                                           | 846.6       | 5.71E-05 | 465.2482         | 429006  | 829933  | 363186969            | 95756105  |
| M431T47                                                                                             | 582.7       | 9.41E-04 | 431.2427         | 592296  | 293753  | 345146904            | 151224744 |
